# Supplementary material for: Ethnicity-Dependent and -Independent Heterogeneity in Healthy Normal Breast Hierarchy Impacts Tumor Characterization
Source: PubMed Central journal article supplement (PMC4550930; doi:10.1038/srep13526), 2015-08-27
Supplement: srep13526-s1.pdf [file srep13526-s1.pdf]

# **Ethnicity-Dependent and -Independent Heterogeneity in Healthy Normal Breast Hierarchy Impacts Tumor Characterization**

Harikrishna Nakshatri<sup>1,2,3,4\*</sup>, Manjushree Anjanappa<sup>1</sup>, and Poornima Bhat-Nakshatri<sup>1</sup>,

Departments of Surgery<sup>1</sup>, Biochemistry and Molecular Biology<sup>2</sup>, Center for Computational Biology and Bioinformatics<sup>3</sup>, Indiana University School of Medicine, Indianapolis, IN 46202, USA; VA Roudebush Medical Center<sup>4</sup>, Indianapolis, IN 46202, USA

**Supplementary data (except Table S2)**

**Table S1:** Age, BMI, Ethnicity and pregnancy history of healthy donors at the time of tissue collection. CA, Caucasian; AA, African American; NA, not applicable. Unknown menstrual cycle indicates substantial gap from the last period.

| Number | Age | Ethnicity | BMI  | Pregnancy | Menopausal status | Menstrual cycle at time of collection |
|--------|-----|-----------|------|-----------|-------------------|---------------------------------------|
| KTB2   | 23  | Mixed     | 37.6 | 0         | Pre               | Luteal                                |
| KTB3   | 42  | CA        | 28   | 0         | Pre               | Luteal                                |
| KTB6   | 31  | CA        | 29.6 | 0         | Pre               | Luteal                                |
| KTB7   | 38  | CA        | 30   | 2         | Pre               | Follicular                            |
| KTB8   | 35  | AA        | 34.4 | 6         | Pre               | Luteal                                |
| KTB9   | 62  | CA        | 24.8 | 6         | Post              | NA                                    |
| KTB10  | 41  | CA        | 20.9 | 2         | Pre               | Unknown                               |
| KTB32  | 48  | AA        | 21.3 | 0         | Post              | NA                                    |
| KTB33  | 29  | CA        | 22.6 | 0         | Pre               | Follicular                            |
| KTB34  | 37  | CA        | 19.8 | 2         | Pre               | Luteal                                |
| KTB36  | 28  | CA        | 29.5 | 2         | Pre               | Follicular                            |
| KTB37  | 34  | CA        | 22.7 | 1         | Pre               | Luteal                                |
| KTB39  | 33  | AA        | 24.5 | 1         | Pre               | Unknown                               |
| KTB40  | 35  | AA        | 23.4 | 1         | Pre               | Luteal                                |
| KTB41  | 35  | AA        | 22.4 | 2         | Pre               | Luteal                                |
| KTB42  | 39  | AA        | 41.8 | 1         | Pre               | Unknown                               |

**Table S3:** Characteristics of tumors that were grown and analyzed by flow cytometry. Age and ethnicity of patients are also indicated.

| Patient # | Histopathology                     | Age | Ethnicity        | Tumor grade | Nodal Status | Tumor grade | ER/PR/Her2 Status | Differentiation           |
|-----------|------------------------------------|-----|------------------|-------------|--------------|-------------|-------------------|---------------------------|
| 1         | IDC                                | 46  | Caucasian        | T1c         | N0           |             | +/+/-             | Differentiated            |
| 2         | IDC                                | 56  | African-American | T1a         | N0           |             | +/+/-             | Differentiated            |
| 3         | Mixed lobular and ductal carcinoma | 45  | Hispanic         | T2          | N2a          | III         | +/+/-             | Moderately differentiated |
| 4*        | IDC                                | 44  | African-American | T1c         | N1a          | II/III      | +/-/+             | Moderately differentiated |
| 5         | IDC                                | 70  | Caucasian        | T2          | N1a          | III         | -/-/-             | Poorly differentiated     |
| 6         | IDC                                | 44  | Caucasian        | T2          | N0           | III         | +/+/-             | Poorly differentiated     |
| 7         | IDC                                | 40  | African-American | T2          | Nx           | III         | +/+/Her2 neg (2+) | Moderately differentiated |
| 8         | TNBC inflammatory                  | 54  | Caucasian        | T4b         | N2a          |             | -/-/-             | Poorly differentiated     |
| 9*        | TNBC-IDC                           | 44  | African American | T1c         | N0           | III         | -/-/-/            | Poorly differentiated     |

\*Received neoadjuvant chemotherapy

**Table S4:** List of antibodies and other flow cytometry reagents used in the study.

| Antibody             | Catalogue Number | Source                 |
|----------------------|------------------|------------------------|
| CD44-APC             | 559942           | BD Pharmingen          |
| CD24-PE              | 555428           | BD Pharmingen          |
| CD49f-APC            | FAB13501A        | R&D Systems            |
| EpCAM-PE             | 130-091-253      | Miltenyi Biotech       |
| EpCAM-APC            | 130-091-254      | Miltenyi Biotech       |
| Jam-A-PE             | 552556           | BD Pharmingen          |
| MUC-1-FITC           | 559774           | BD Pharmingen          |
| CD271-APC            | 345108           | Biolegend              |
| PROCR (CD201)-PE     | 130-105-256      | Miltenyi Biotech       |
| Pan-Cytokeratin-FITC | F3418            | Sigma Aldrich          |
| ALDEFLUOR            | 01700            | Stem Cell Technologies |
| CD140b-PE            | 558322           | BD Biosciences         |
| CD24-FITC            | 555427           | BD Pharmingen          |
| CD49f-FITC           | 555735           | BD Pharmingen          |
| CD45-PE              | 130-080-201      | Miltenyi Biotech       |
| CD31-PE              | 130-092-653      | Miltenyi Biotech       |

**Figure S1:** Breast epithelial cells from healthy donors show inter-individual heterogeneity. Percentage of different subpopulation of cells from self-reported five Caucasian and four African American women is shown.

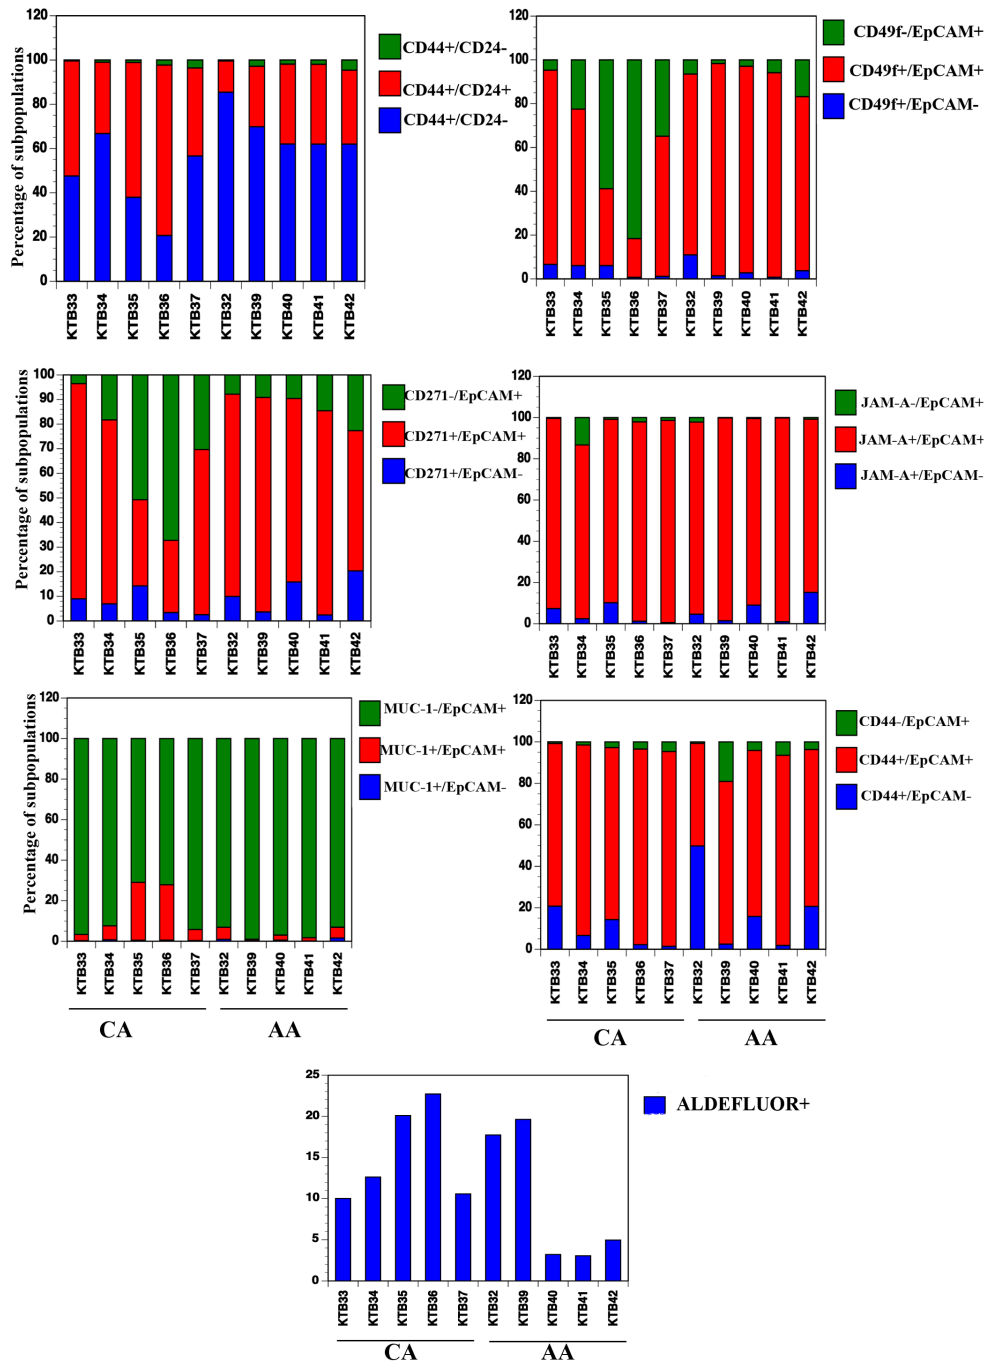

**Figure S2:** Breast epithelial cells from healthy donors show inter-individual heterogeneity. Cells from seven donors were stained with the indicated antibodies, and flow cytometry was used to identify cell subpopulations. The vertical arrow indicates a unique CD44<sup>high</sup>/CD24<sup>-</sup> subpopulation in an AA donor. This figure shows raw flow cytometry pattern of data presented in Figure 1

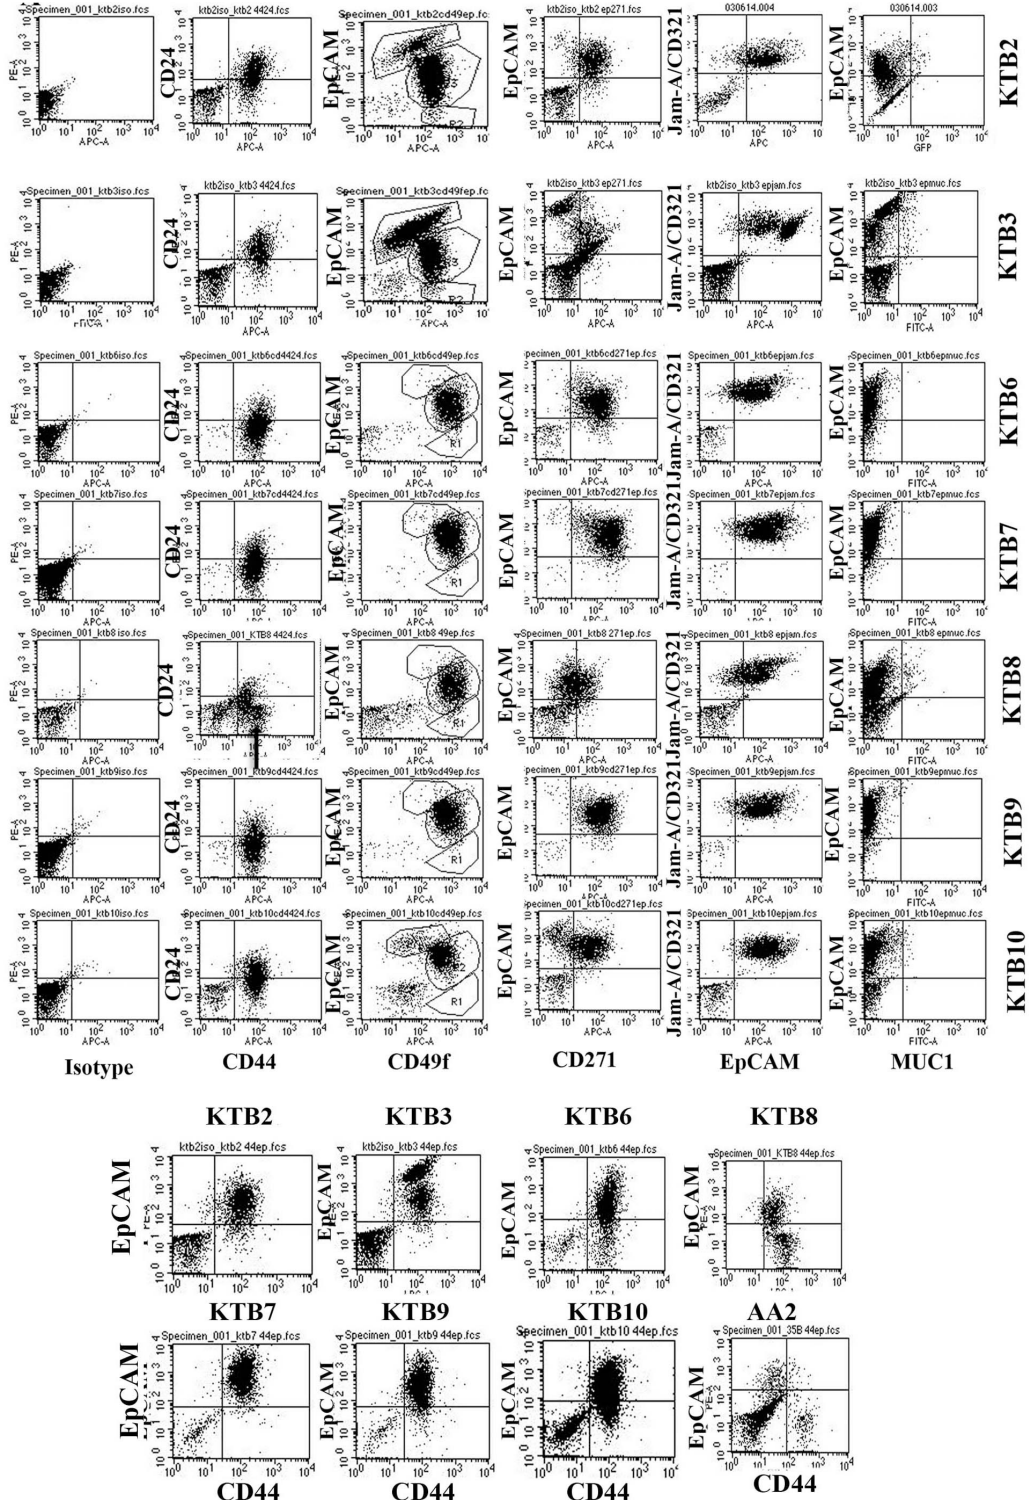

Figure S3: Flow cytometry dot blots of data presented in Figure S1.

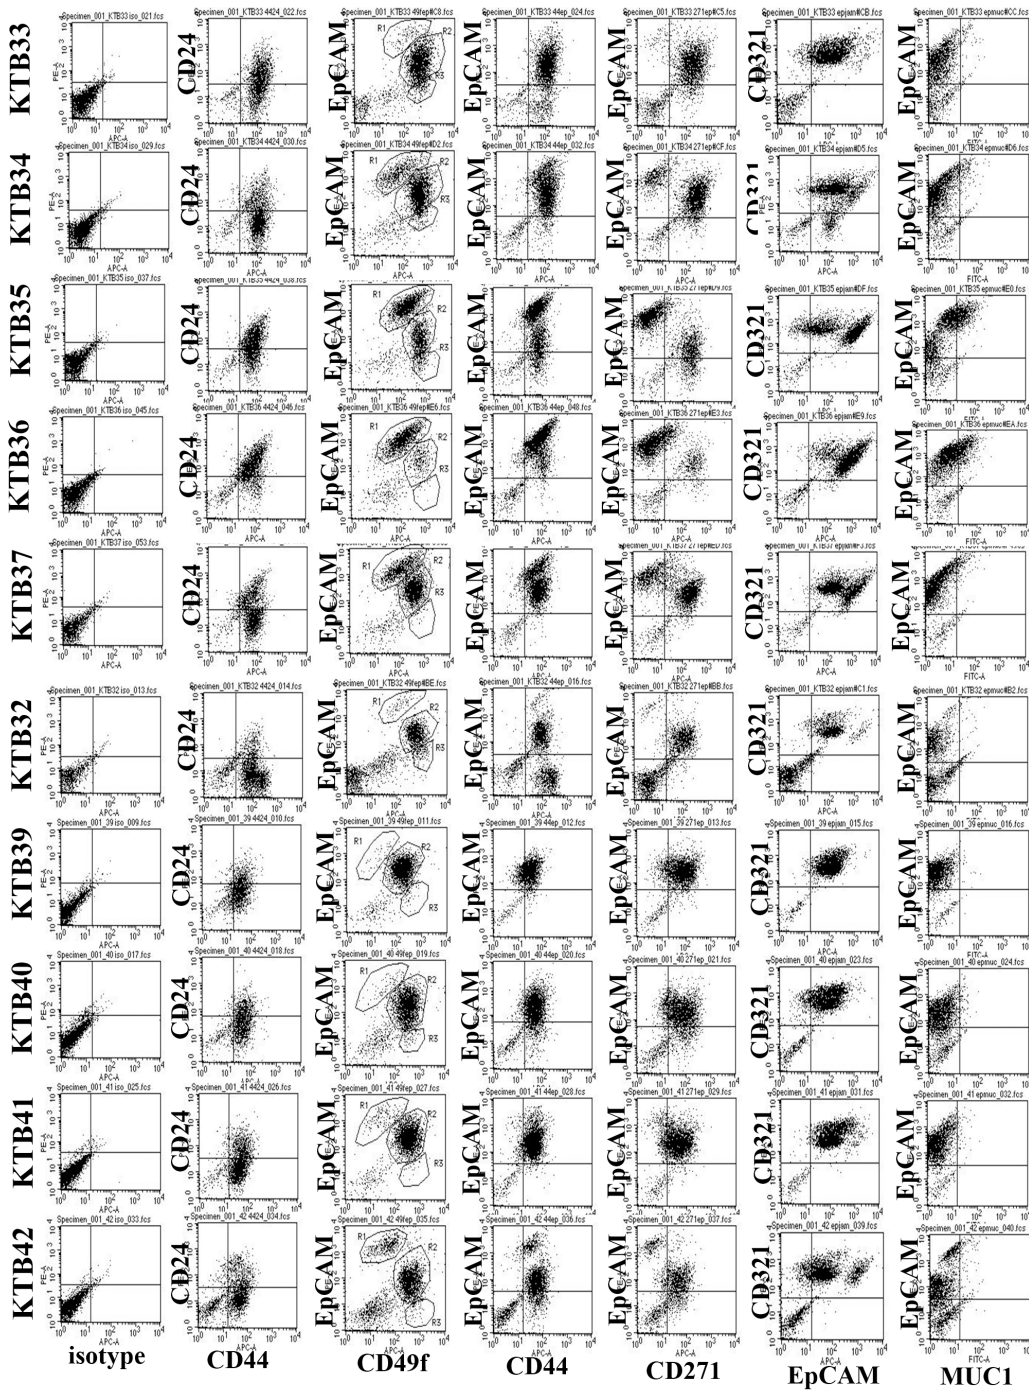

**Figure S4:** Documenting heterogeneity in breast epithelial cells of healthy donors measured using ALDEFLUOR staining. Cells were stained with ALDEFLUOR. DEAB, a competitive inhibitor of ALDH, was used as a negative control and to establish the baseline fluorescence of these cells.

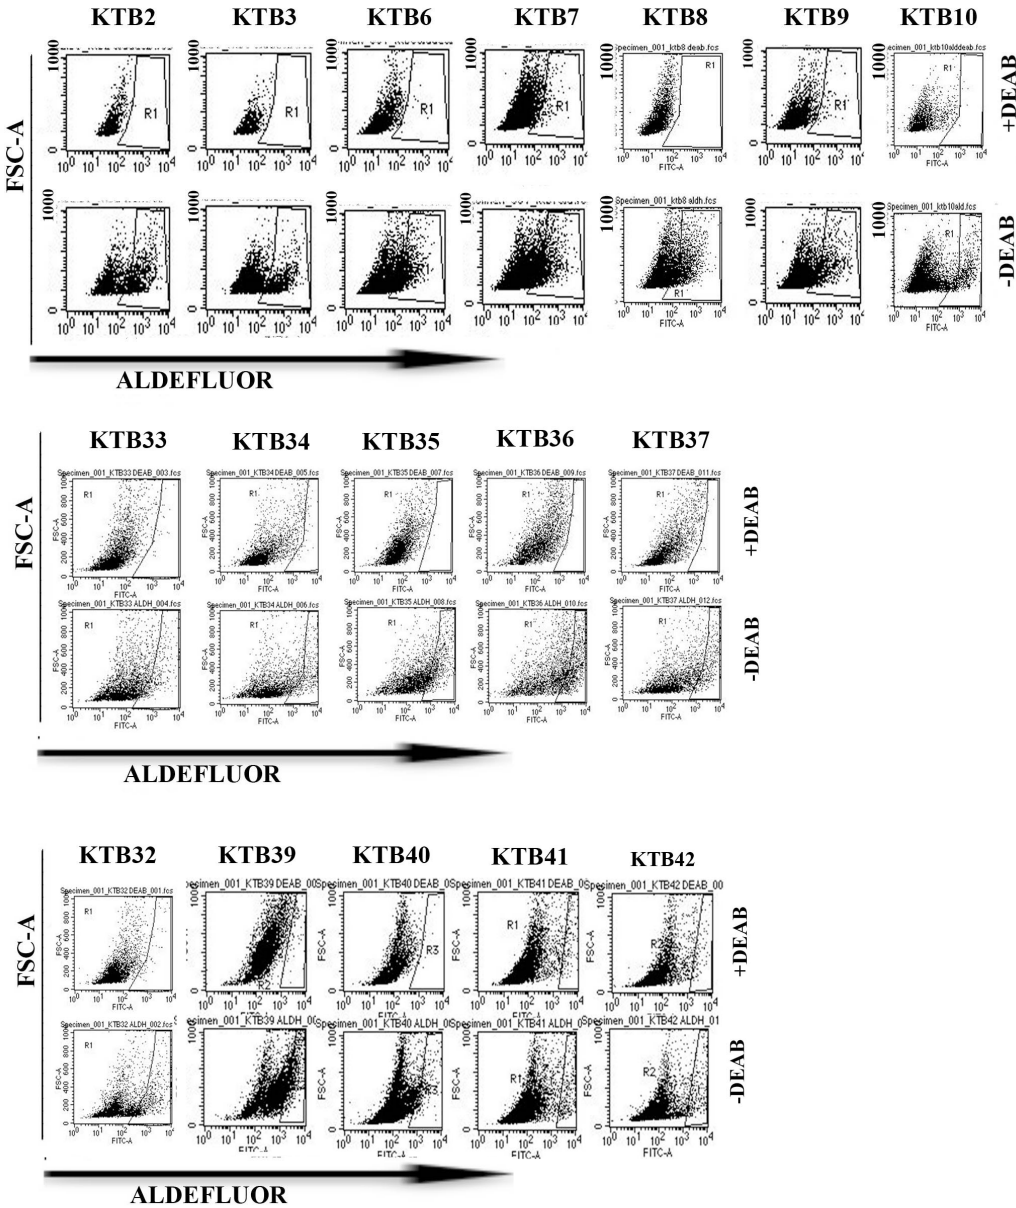



**Figure S5:** A) Irradiated fibroblasts do not stain for most of the cell surface markers or ALDEFLUOR. B) Epithelial cells grown under reprogramming assay contain <4% contaminating hematopoietic (CD45+) and endothelial cells (CD31+) cells. These cells did not stain for CD140b suggesting lack of fibroblast contamination. CD44/CD24 and CD49f/EpCAM staining patterns were not significantly affected if CD31 and CD45-positive populations were included or excluded in the analyses. C) Pan-cytokeratin antibody staining pattern of epithelial cells.

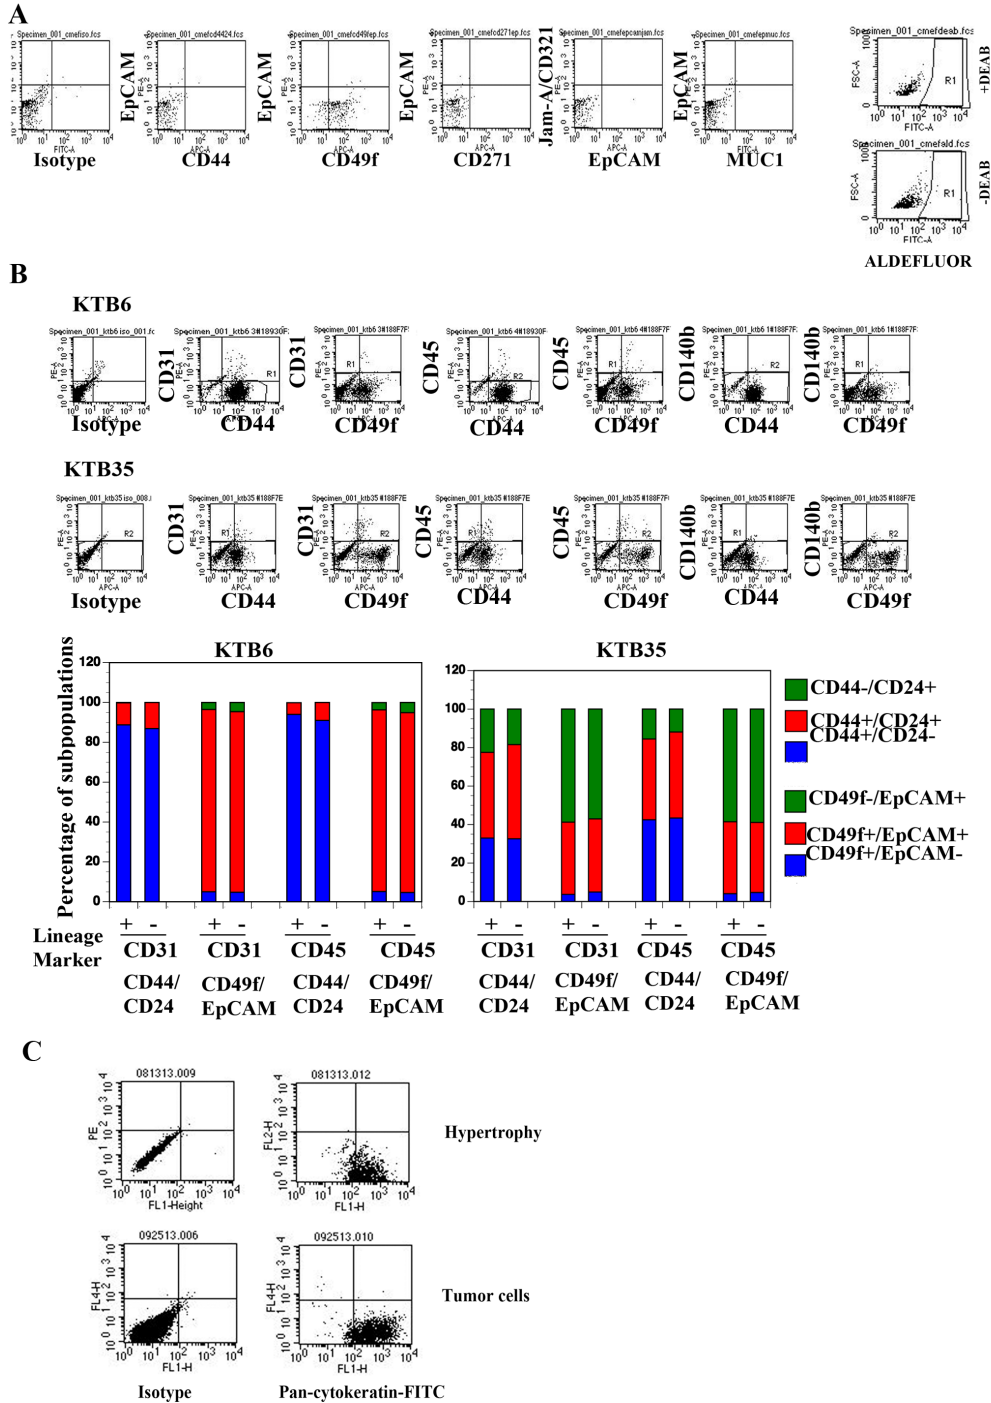

**Figure S6:** Pathway analysis of genes differentially expressed in CD44<sup>high</sup>/CD24<sup>-</sup> subpopulation compared with CD44<sup>+</sup>/CD24<sup>-</sup> cells. A) Pathway-associated with up-regulated genes in CD44<sup>high</sup>/CD24<sup>-</sup> cells. B) Pathway-associated with down-regulated genes in CD44<sup>high</sup>/CD24<sup>-</sup> cells.

**A Genes elevated in CD44high/CD24- cells**

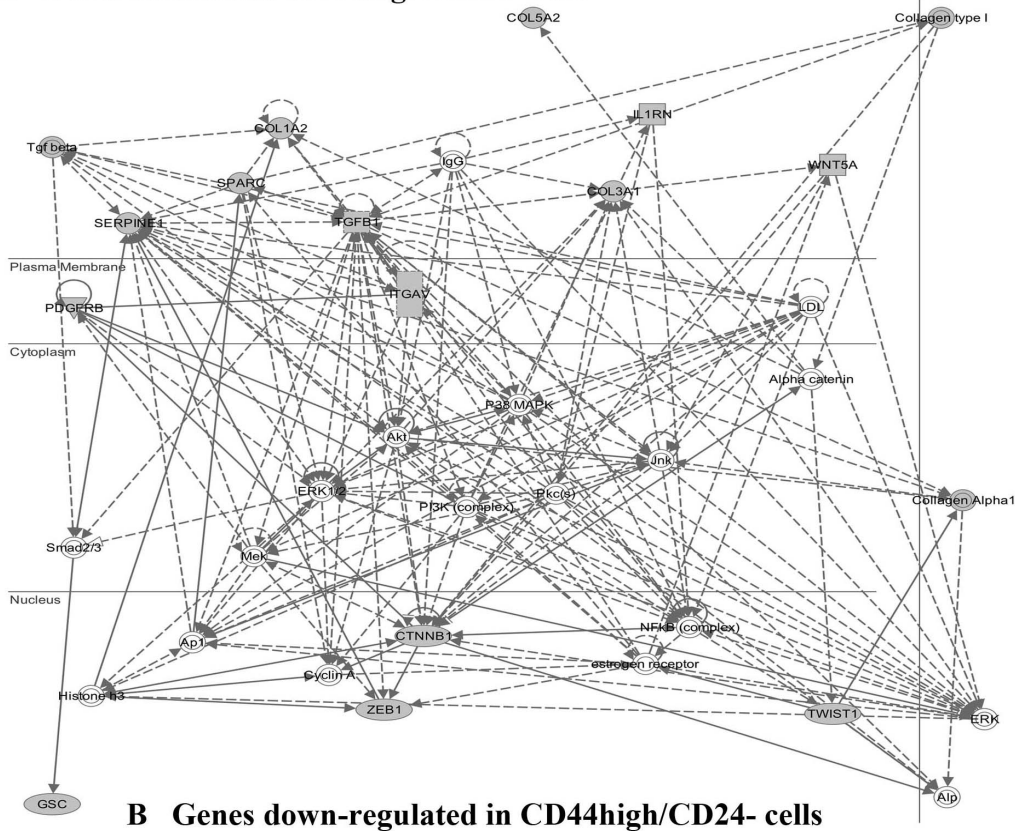

**B Genes down-regulated in CD44high/CD24- cells**

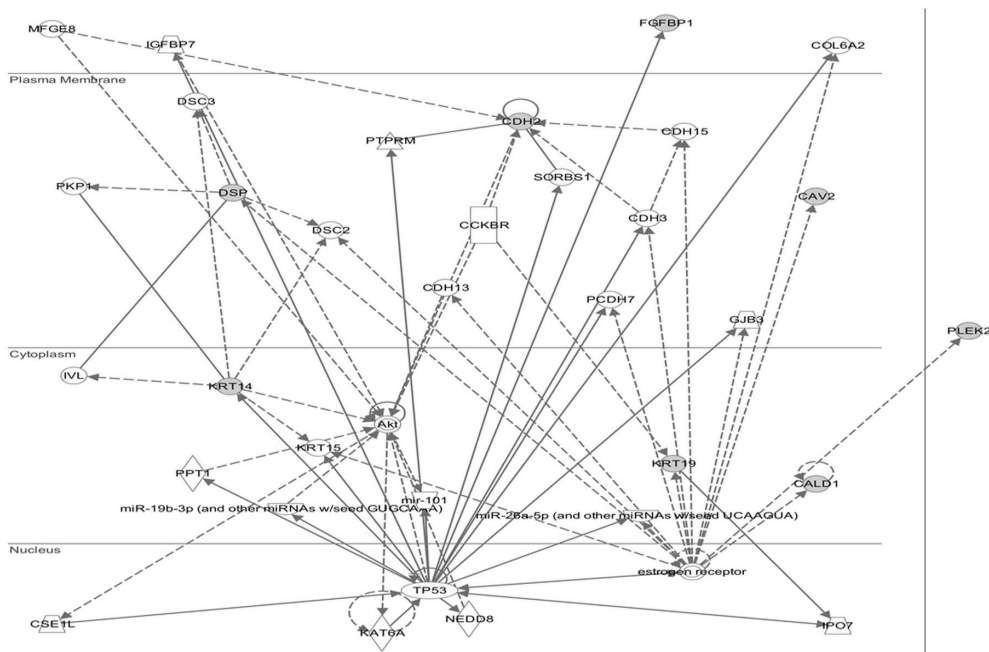

**Figure S7:** Cells derived from AA women are enriched for PROCR+/EpCAM-cells. Self-reported ethnicity of women is indicated.

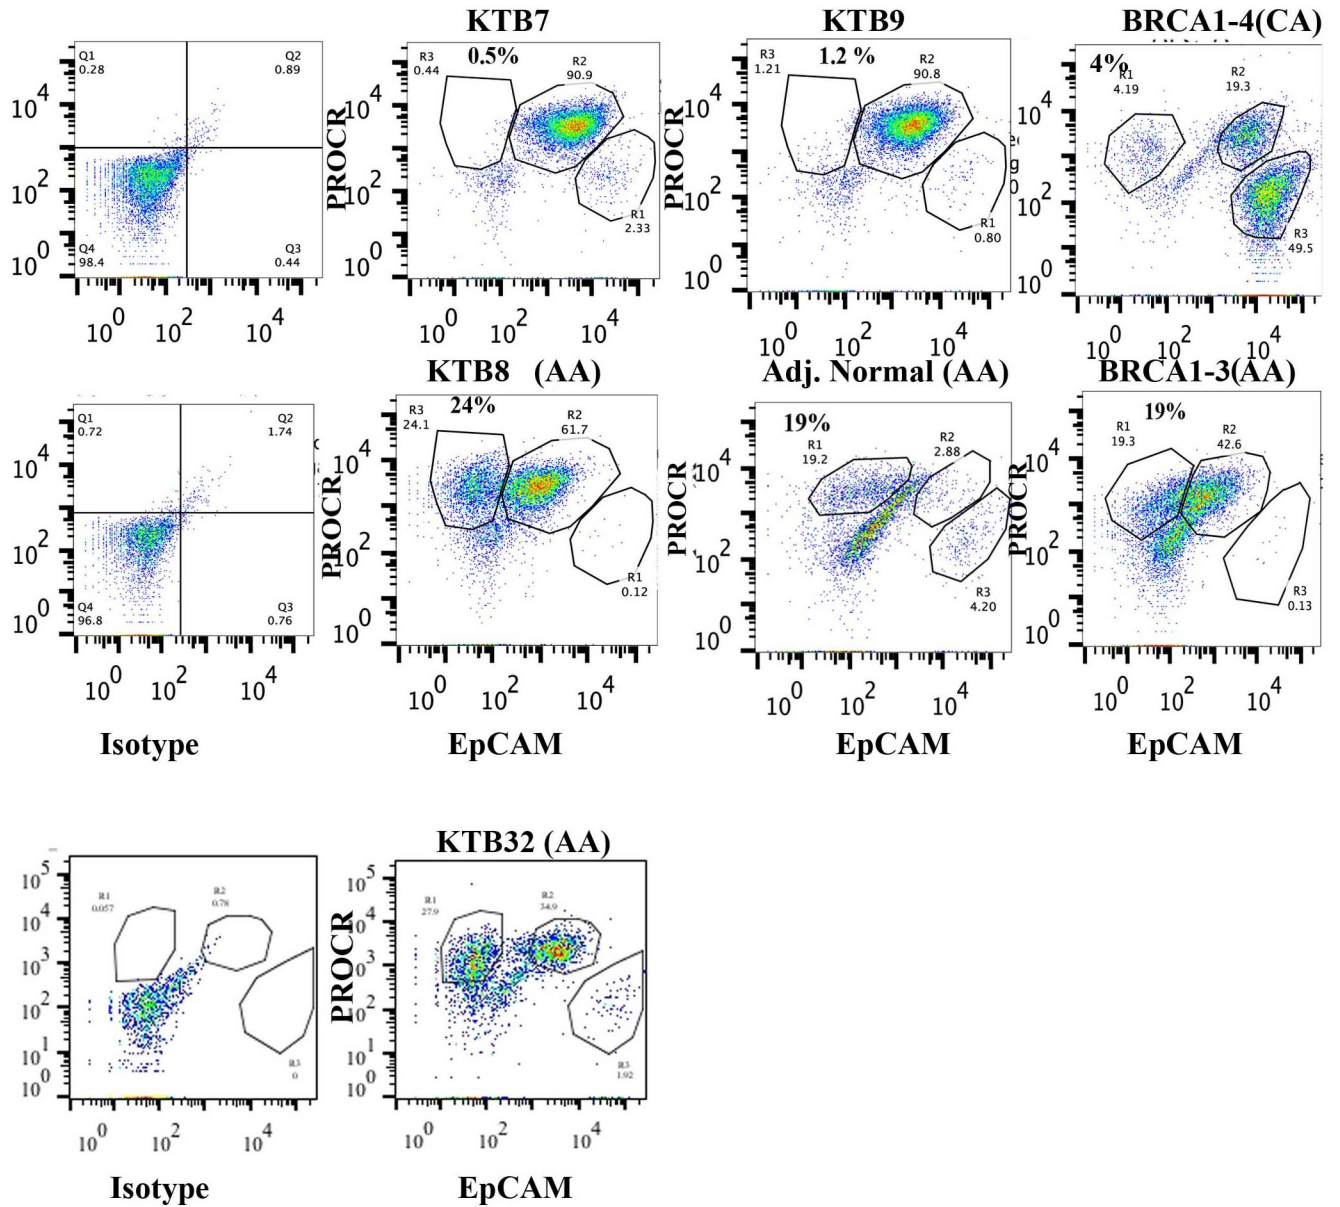

**Figure S8:** Inter-individual heterogeneity in BRCA1-mutant carriers. A) Breast epithelial cells from four BRCA1-mutant carriers and three BRCA2-mutant carriers were stained with antibodies against the indicated cell surface markers and subjected to flow cytometry. The vertical arrow indicates a unique CD44<sup>high</sup>/CD24<sup>-</sup> subpopulation in the AA BRCA1-mutant carrier. B) BRCA1-mutant carriers have lower numbers of ALDEFLUOR<sup>+</sup> cells. Assays were performed as in Figure S4.

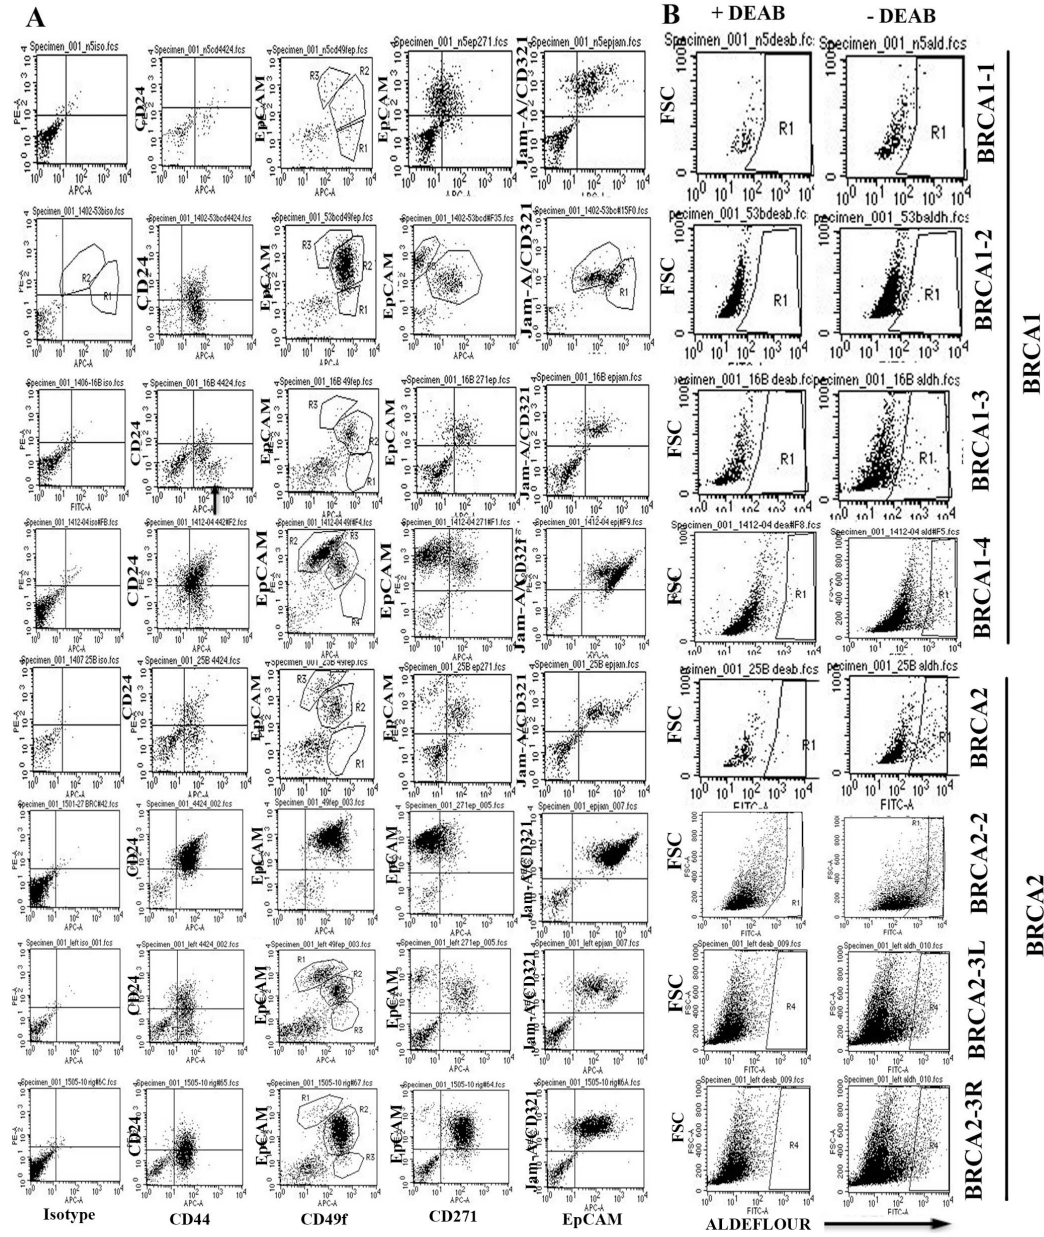

**Figure S9:** Breast epithelial cells from high-risk patients do not show unique patterns. Breast epithelial cells from a case of hypertrophy, a patient with recurrent breast cancer and a patient with fibrosis were stained with indicated antibody.

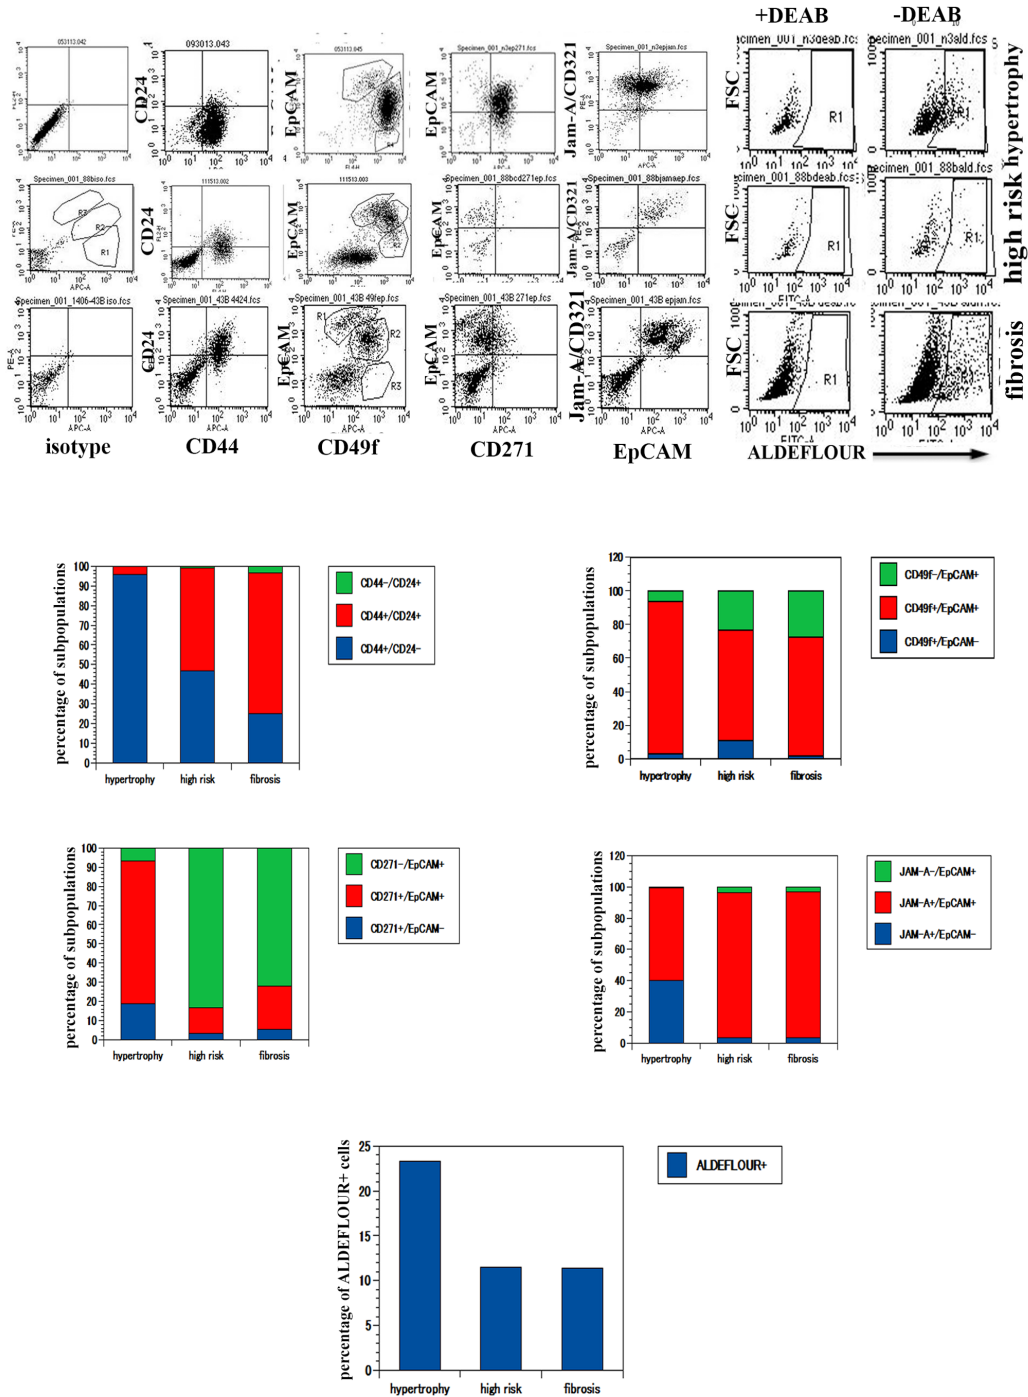

**Figure S10:** Tumor and adjacent normal cells show differences in CD49f and EpCAM staining pattern. Tumor and adjacent normal cells from six patients were stained with isotype control, CD44-APC/CD24-PE or CD49f-APC/EpCAM-PE and subjected to flow cytometry. The tumor characteristics, age, and ethnicity of the patients are indicated. CD44+/CD24- cells in tumors are suggested to be CSCs. CD49f+/EpCAM-, CD49f+/EpCAM+, and CD49f-/EpCAM+ cells are considered to represent stem, luminal progenitor, and mature/differentiated cells, respectively.

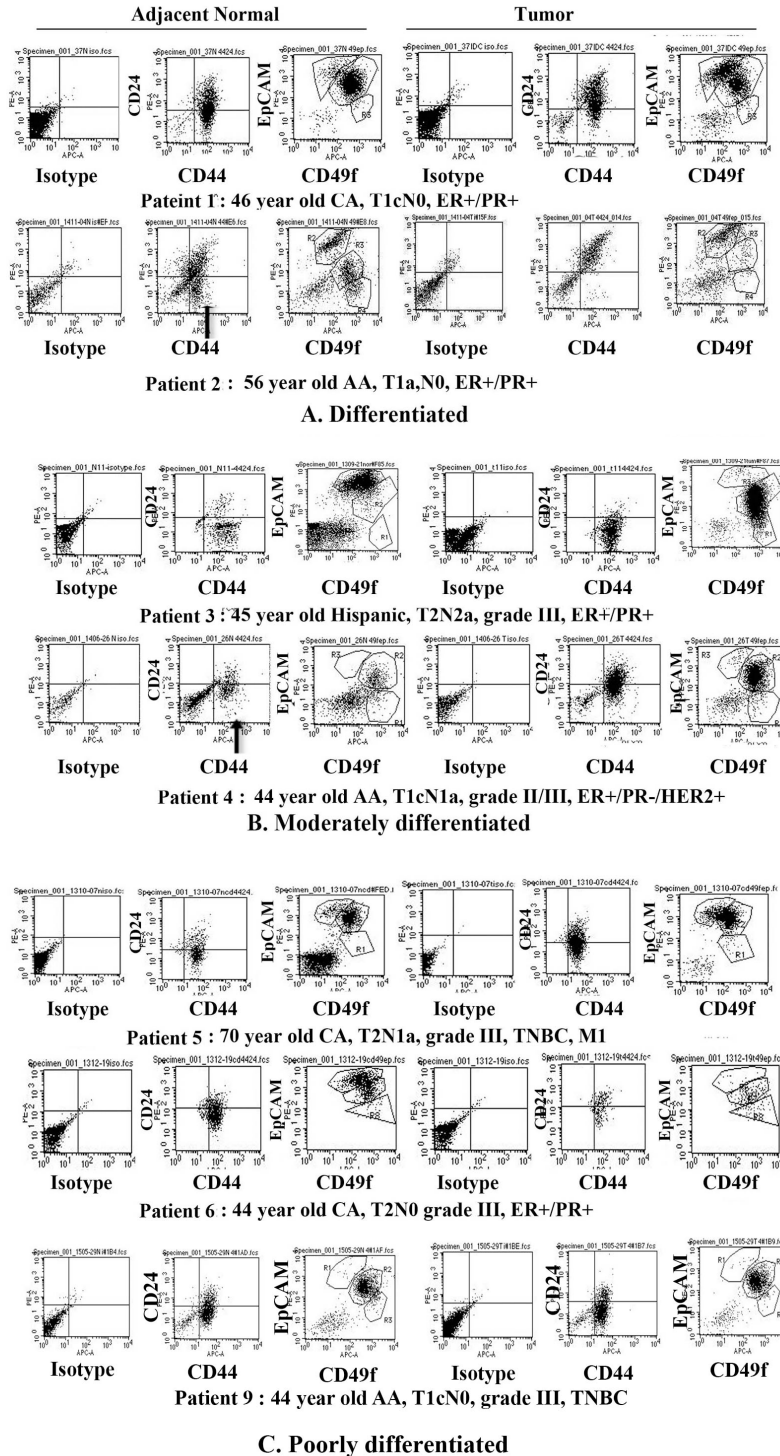

**Figure S11:** A) CSC-associated marker profile of tumor cells propagated from an ER+/PR+ moderately differentiated tumor. B) CSC-associated marker profile of a TNBC inflammatory breast cancer.

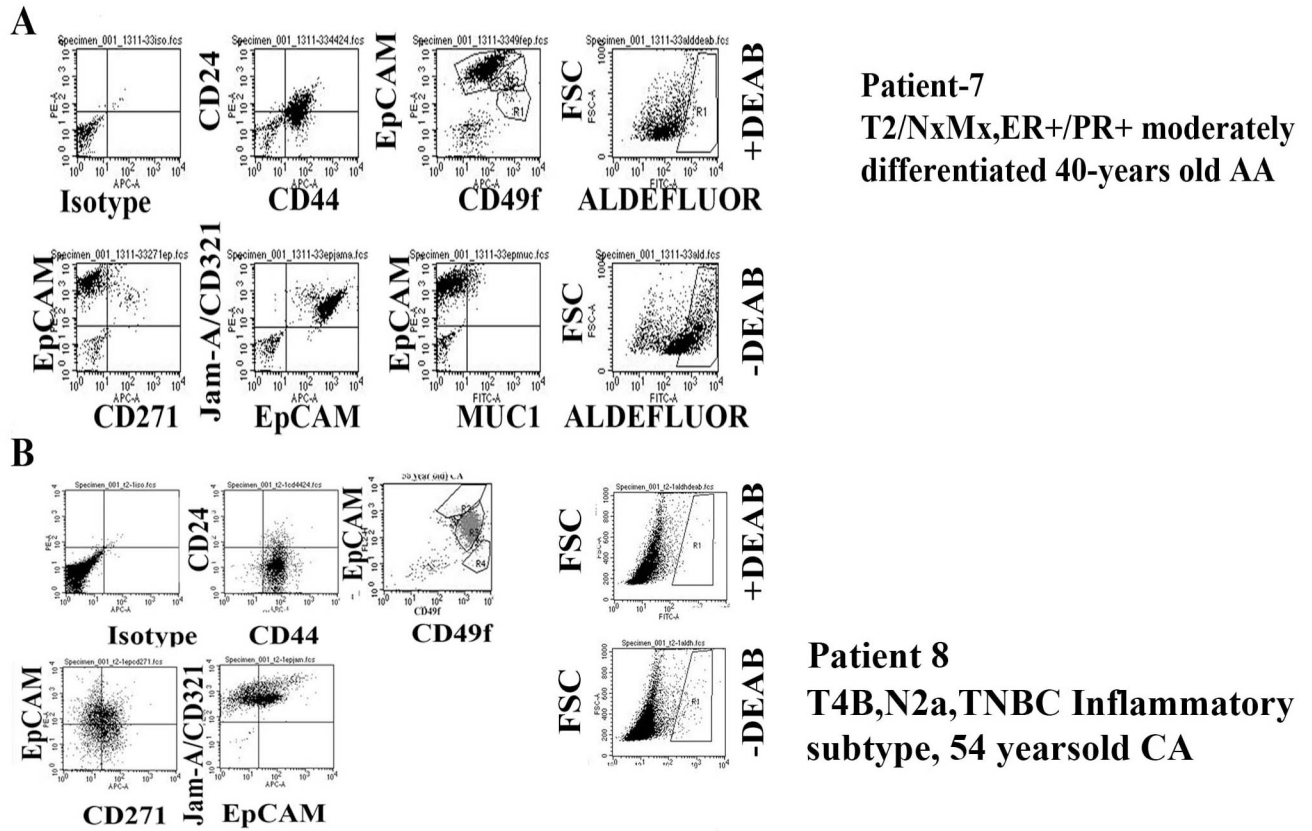

**Figure S12:** Tumor and adjacent normal cells show differences in ALDEFLUOR+ cells. A) The ALDEFLUOR staining pattern in tumor and adjacent normal cells from six patients. All but two tumors contained higher ALDEFLUOR+ cells compared with adjacent normal cells. B). CD271-APC/EpCAM-PE staining pattern of tumor and adjacent normal cells. C) Jam-A-PE/EpCAM-APC staining pattern of tumor and adjacent normal cells.

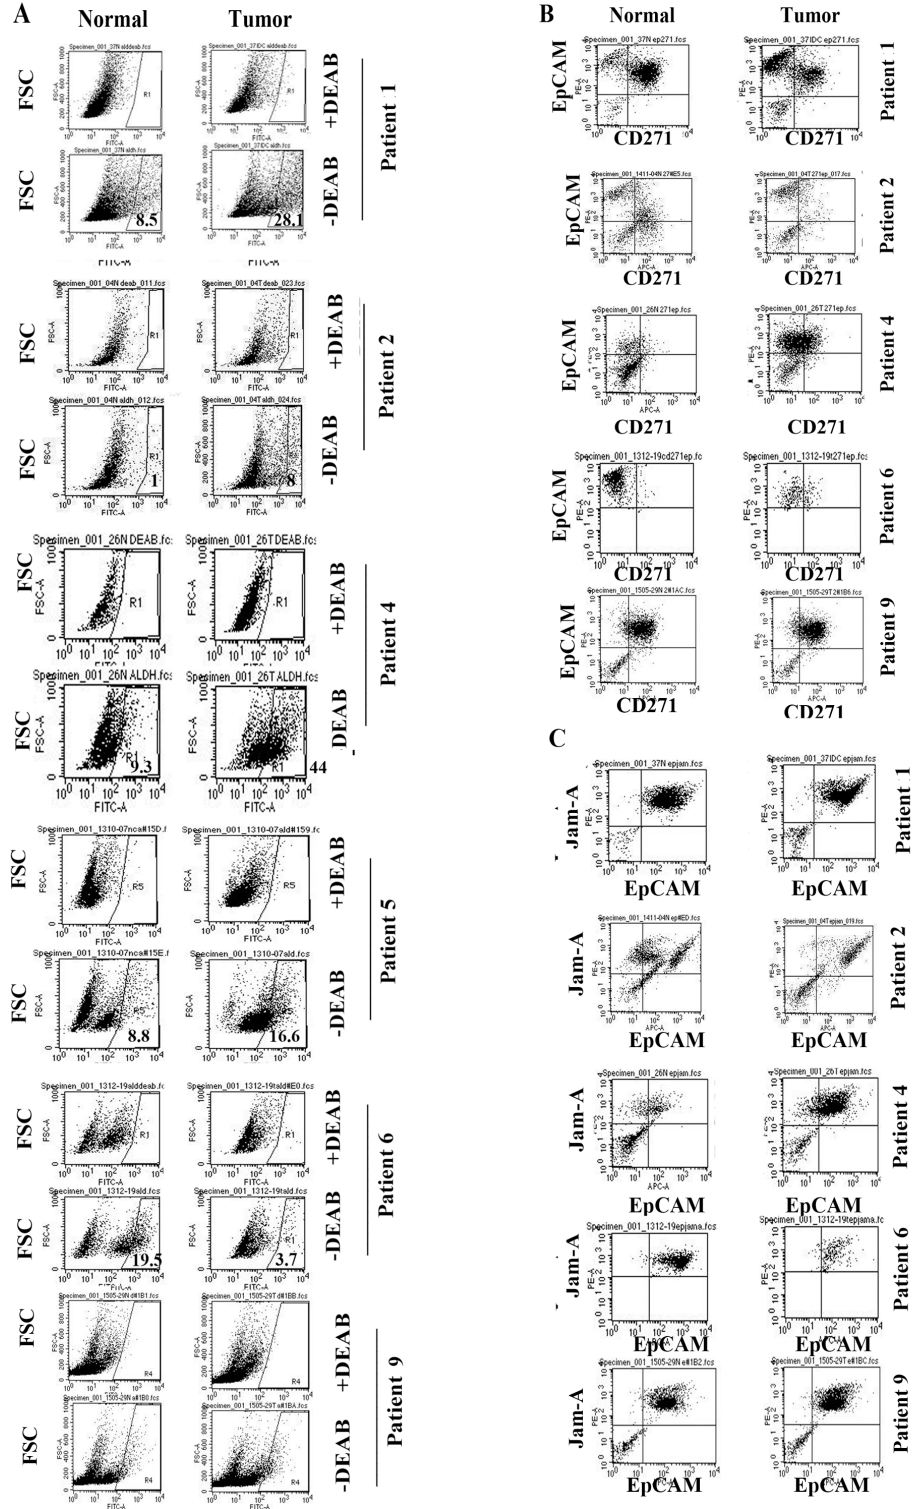



**Figure S13:** Cell surface markers and ALDEFLUOR staining pattern of cells obtained from two breasts of a woman with benign disease.

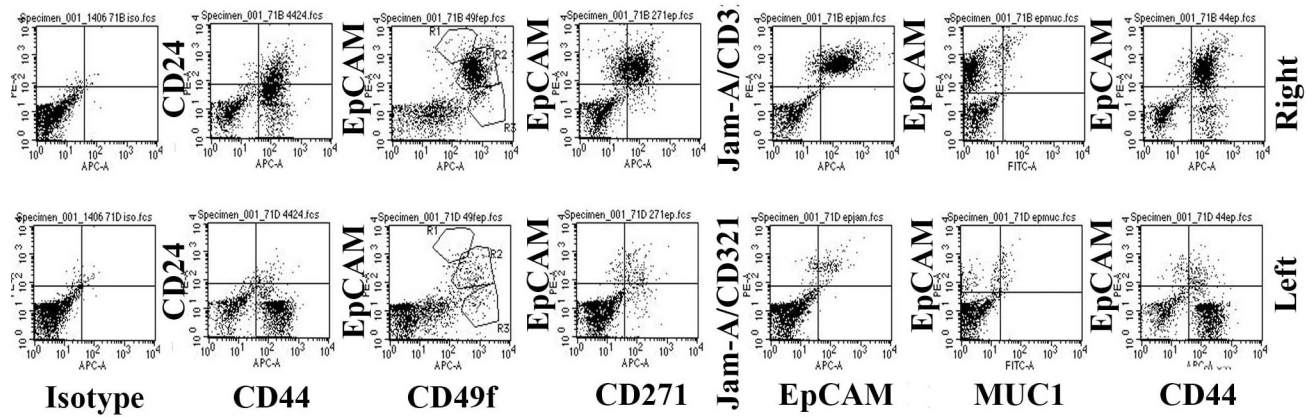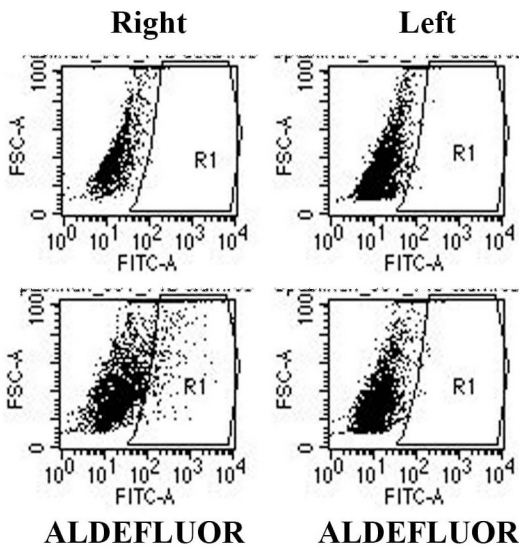

**47-years old CA**  
**Right: Stromal fibrosis with microcalcification**  
**Left: Unusual ductal hyperplasia, microcalcification, fibroadenomatous changes**
