# Supplementary material for: Ethnicity-Dependent and -Independent Heterogeneity in Healthy Normal Breast Hierarchy Impacts Tumor Characterization
Source: PubMed Central journal article supplement (PMC4550930; doi:10.1038/srep13526), 2015-08-27
Supplement: srep13526-s2.pdf [file srep13526-s2.pdf]

# **Ethnicity-Dependent and -Independent Heterogeneity in Healthy Normal Breast Hierarchy Impacts Tumor Characterization**

Harikrishna Nakshatri<sup>1,2,3,4\*</sup>, Manjushree Anjanappa<sup>1</sup>, and Poornima Bhat-Nakshatri<sup>1</sup>,

Departments of Surgery<sup>1</sup>, Biochemistry and Molecular Biology<sup>2</sup>, Center for Computational Biology and Bioinformatics<sup>3</sup>, Indiana University School of Medicine, Indianapolis, IN 46202, USA; VA Roudebush Medical Center<sup>4</sup>, Indianapolis, IN 46202, USA

**Supplementary data Table S2**

| Symbol  | Well | AVG $\Delta C_t$<br>(Ct(GOI) - Ave Ct<br>(HKG)) |                       | $2^{-\Delta C_t}$ |                   | Fold Change                   | T-TEST          | Fold Up- or Down-<br>Regulation | Comments |
|---------|------|-------------------------------------------------|-----------------------|-------------------|-------------------|-------------------------------|-----------------|---------------------------------|----------|
|         |      | KTB8<br>CD44+                                   | KTB8<br>CD44+/2<br>4+ | KTB8<br>CD44+     | KTB8<br>CD44+/24+ | KTB8 CD44+<br>/KTB8 CD44+/24+ | p value         | KTB8 CD44+<br>/KTB8 CD44+/24+   |          |
| AHNAK   | A01  | 3.23                                            | 3.22                  | 1.1E-01           | 1.1E-01           | 1.00                          | 0.912197        | -1.00                           | C        |
| AKT1    | A02  | 3.83                                            | 4.02                  | 7.0E-02           | 6.2E-02           | 1.14                          | 0.971183        | 1.14                            | C        |
| BMP1    | A03  | 3.89                                            | 4.99                  | 6.7E-02           | 3.2E-02           | 2.13                          | 0.117060        | 2.13                            | C        |
| BMP7    | A04  | 9.29                                            | 7.85                  | 1.6E-03           | 4.3E-03           | 0.37                          | 0.149257        | -2.71                           | C        |
| CALD1   | A05  | 10.03                                           | 8.29                  | 9.6E-04           | 3.2E-03           | <b>0.30</b>                   | 0.260638        | <b>-3.34</b>                    | C        |
| CAMK2N1 | A06  | 0.83                                            | 2.22                  | 5.6E-01           | 2.1E-01           | 2.63                          | <b>0.041264</b> | 2.63                            | C        |
| CAV2    | A07  | 4.39                                            | 2.12                  | 4.8E-02           | 2.3E-01           | <b>0.21</b>                   | <b>0.017252</b> | <b>-4.83</b>                    | C        |
| CDH1    | A08  | 3.79                                            | 3.52                  | 7.2E-02           | 8.7E-02           | 0.83                          | 0.474747        | -1.21                           | C        |
| CDH2    | A09  | 5.06                                            | 2.19                  | 3.0E-02           | 2.2E-01           | <b>0.14</b>                   | <b>0.018398</b> | <b>-7.33</b>                    | C        |
| COL1A2  | A10  | 4.13                                            | 7.15                  | 5.7E-02           | 7.0E-03           | <b>8.15</b>                   | 0.087698        | <b>8.15</b>                     | C        |
| COL3A1  | A11  | -2.37                                           | 1.42                  | 5.2E+00           | 3.7E-01           | <b>13.86</b>                  | <b>0.041314</b> | <b>13.86</b>                    | C        |
| COL5A2  | A12  | -0.97                                           | 2.35                  | 2.0E+00           | 2.0E-01           | <b>10.03</b>                  | <b>0.046034</b> | <b>10.03</b>                    | C        |
| CTNNB1  | B01  | 0.79                                            | 4.15                  | 5.8E-01           | 5.6E-02           | <b>10.27</b>                  | <b>0.012413</b> | <b>10.27</b>                    | C        |
| DSC2    | B02  | 4.43                                            | 4.42                  | 4.6E-02           | 4.7E-02           | 1.00                          | 0.731507        | -1.00                           | C        |
| DSP     | B03  | 6.83                                            | 3.92                  | 8.8E-03           | 6.6E-02           | <b>0.13</b>                   | <b>0.015141</b> | <b>-7.50</b>                    | C        |
| EGFR    | B04  | 2.13                                            | 0.95                  | 2.3E-01           | 5.2E-01           | 0.44                          | <b>0.007340</b> | -2.26                           | C        |
| ERBB3   | B05  | 4.56                                            | 3.32                  | 4.2E-02           | 1.0E-01           | 0.42                          | 0.122344        | -2.36                           | C        |
| ESR1    | B06  | 8.39                                            | 7.62                  | 3.0E-03           | 5.1E-03           | 0.59                          | 0.780092        | -1.71                           | C        |
| F11R    | B07  | 8.09                                            | 7.42                  | 3.7E-03           | 5.8E-03           | 0.63                          | 0.615789        | -1.59                           | C        |
| FGFBP1  | B08  | 6.36                                            | 4.22                  | 1.2E-02           | 5.4E-02           | <b>0.23</b>                   | 0.051791        | <b>-4.41</b>                    | C        |
| FN1     | B09  | 6.33                                            | 4.35                  | 1.2E-02           | 4.9E-02           | <b>0.25</b>                   | 0.245602        | <b>-3.93</b>                    | C        |
| FOXC2   | B10  | -3.34                                           | -1.95                 | 1.0E+01           | 3.9E+00           | 2.63                          | <b>0.035537</b> | 2.63                            | C        |
| FZD7    | B11  | 6.23                                            | 6.49                  | 1.3E-02           | 1.1E-02           | 1.20                          | 0.885964        | 1.20                            | C        |
| GNG11   | B12  | 7.43                                            | 7.69                  | 5.8E-03           | 4.9E-03           | 1.20                          | 0.976920        | 1.20                            | C        |
| GSC     | C01  | 5.26                                            | 7.95                  | 2.6E-02           | 4.0E-03           | <b>6.47</b>                   | <b>0.013126</b> | <b>6.47</b>                     | C        |
| GSK3B   | C02  | 9.36                                            | 8.45                  | 1.5E-03           | 2.9E-03           | 0.53                          | 0.287713        | -1.87                           | C        |
| IGFBP4  | C03  | 4.33                                            | 3.15                  | 5.0E-02           | 1.1E-01           | 0.44                          | <b>0.031560</b> | -2.26                           | C        |

|          |     |       |       |         |         |              |                 |               |   |
|----------|-----|-------|-------|---------|---------|--------------|-----------------|---------------|---|
| IL1RN    | C04 | 2.19  | 6.49  | 2.2E-01 | 1.1E-02 | <b>19.61</b> | 0.051503        | <b>19.61</b>  | C |
| ILK      | C05 | 6.86  | 3.49  | 8.6E-03 | 8.9E-02 | <b>0.10</b>  | 0.119825        | <b>-10.36</b> | C |
| ITGA5    | C06 | 2.89  | 3.92  | 1.3E-01 | 6.6E-02 | 2.04         | 0.128279        | 2.04          | C |
| ITGAV    | C07 | 1.03  | 3.65  | 4.9E-01 | 7.9E-02 | <b>6.18</b>  | <b>0.024778</b> | <b>6.18</b>   | C |
| ITGB1    | C08 | 3.69  | 4.19  | 7.7E-02 | 5.5E-02 | 1.41         | 0.202542        | 1.41          | C |
| JAG1     | C09 | 0.69  | 0.35  | 6.2E-01 | 7.8E-01 | 0.79         | 0.113321        | -1.27         | C |
| KRT14    | C10 | 4.46  | 3.22  | 4.5E-02 | 1.1E-01 | 0.42         | <b>0.009191</b> | -2.36         | C |
| KRT19    | C11 | 0.93  | -2.98 | 5.3E-01 | 7.9E+00 | <b>0.07</b>  | <b>0.025691</b> | <b>-15.00</b> | C |
| KRT7     | C12 | 8.76  | 7.15  | 2.3E-03 | 7.0E-03 | <b>0.33</b>  | 0.237295        | <b>-3.05</b>  | C |
| MAP1B    | D01 | 2.43  | 0.02  | 1.9E-01 | 9.9E-01 | <b>0.19</b>  | 0.229348        | <b>-5.30</b>  | C |
| MITF     | D02 | 3.13  | 4.75  | 1.1E-01 | 3.7E-02 | <b>3.09</b>  | 0.098113        | <b>3.09</b>   | C |
| MMP2     | D03 | 5.06  | 5.05  | 3.0E-02 | 3.0E-02 | 1.00         | 0.763075        | -1.00         | C |
| MMP3     | D04 | 8.29  | 8.55  | 3.2E-03 | 2.7E-03 | 1.20         | 0.587971        | 1.20          | C |
| MMP9     | D05 | 7.89  | 5.55  | 4.2E-03 | 2.1E-02 | <b>0.20</b>  | 0.064449        | <b>-5.06</b>  | C |
| MSN      | D06 | 2.09  | 2.32  | 2.3E-01 | 2.0E-01 | 1.17         | 0.707753        | 1.17          | C |
| MST1R    | D07 | 8.59  | 7.79  | 2.6E-03 | 4.5E-03 | 0.57         | 0.363787        | -1.75         | C |
| NODAL    | D08 | 8.56  | 8.25  | 2.6E-03 | 3.3E-03 | 0.81         | 0.945023        | -1.24         | C |
| NOTCH1   | D09 | 7.46  | 6.75  | 5.7E-03 | 9.3E-03 | 0.61         | 0.269316        | -1.63         | C |
| NUDT13   | D10 | 8.36  | 7.55  | 3.0E-03 | 5.3E-03 | 0.57         | 0.389204        | -1.75         | C |
| OCLN     | D11 | 7.16  | 5.59  | 7.0E-03 | 2.1E-02 | 0.34         | 0.061550        | -2.98         | C |
| PDGFRB   | D12 | 4.19  | 7.95  | 5.5E-02 | 4.0E-03 | <b>13.55</b> | <b>0.017213</b> | <b>13.55</b>  | C |
| PLEK2    | E01 | 7.69  | 3.95  | 4.8E-03 | 6.5E-02 | <b>0.07</b>  | <b>0.001594</b> | <b>-13.36</b> | C |
| PPPDE2   | E02 | 3.56  | 2.89  | 8.5E-02 | 1.4E-01 | 0.63         | 0.061841        | -1.59         | C |
| PTK2     | E03 | 5.73  | 5.29  | 1.9E-02 | 2.6E-02 | 0.74         | 0.380554        | -1.36         | C |
| PTP4A1   | E04 | 2.53  | 2.19  | 1.7E-01 | 2.2E-01 | 0.79         | 0.345203        | -1.27         | C |
| RAC1     | E05 | 2.59  | 2.19  | 1.7E-01 | 2.2E-01 | 0.75         | 0.353317        | -1.33         | C |
| RGS2     | E06 | 7.03  | 6.22  | 7.7E-03 | 1.3E-02 | 0.57         | 0.390518        | -1.75         | C |
| SERPINE1 | E07 | -2.27 | 0.32  | 4.8E+00 | 8.0E-01 | <b>6.03</b>  | <b>0.006009</b> | <b>6.03</b>   | C |
| SIP1     | E08 | 5.69  | 5.35  | 1.9E-02 | 2.4E-02 | 0.79         | 0.615192        | -1.27         | C |
| SMAD2    | E09 | 4.76  | 4.89  | 3.7E-02 | 3.4E-02 | 1.09         | 0.780876        | 1.09          | C |
| SNAI1    | E10 | 8.93  | 10.09 | 2.1E-03 | 9.2E-04 | 2.23         | 0.370510        | 2.23          | C |
| SNAI2    | E11 | 1.33  | 1.85  | 4.0E-01 | 2.8E-01 | 1.44         | 0.426364        | 1.44          | C |

|          |     |       |       |         |         |             |                 |              |   |
|----------|-----|-------|-------|---------|---------|-------------|-----------------|--------------|---|
| SNAI3    | E12 | 9.03  | 8.42  | 1.9E-03 | 2.9E-03 | 0.66        | 0.577108        | -1.52        | C |
| SOX10    | F01 | 8.53  | 8.09  | 2.7E-03 | 3.7E-03 | 0.74        | 0.893294        | -1.36        | C |
| SPARC    | F02 | -1.21 | 1.69  | 2.3E+00 | 3.1E-01 | <b>7.43</b> | <b>0.033574</b> | <b>7.43</b>  | C |
| SPP1     | F03 | 8.79  | 8.29  | 2.3E-03 | 3.2E-03 | 0.70        | 0.741668        | -1.42        | C |
| STAT3    | F04 | 4.39  | 3.75  | 4.8E-02 | 7.4E-02 | 0.64        | 0.074908        | -1.56        | C |
| STEAP1   | F05 | 5.33  | 5.49  | 2.5E-02 | 2.2E-02 | 1.12        | 0.865424        | 1.12         | C |
| TCF3     | F06 | 5.59  | 4.55  | 2.1E-02 | 4.3E-02 | 0.49        | 0.155955        | -2.06        | C |
| TCF4     | F07 | 4.89  | 5.62  | 3.4E-02 | 2.0E-02 | 1.65        | 0.179796        | 1.65         | C |
| TFPI2    | F08 | 1.76  | 1.15  | 3.0E-01 | 4.5E-01 | 0.66        | 0.479779        | -1.52        | C |
| TGFB1    | F09 | 2.89  | 4.32  | 1.3E-01 | 5.0E-02 | 2.69        | <b>0.008049</b> | 2.69         | C |
| TGFB2    | F10 | 5.99  | 5.79  | 1.6E-02 | 1.8E-02 | 0.87        | 0.731903        | -1.15        | C |
| TGFB3    | F11 | 7.83  | 7.75  | 4.4E-03 | 4.6E-03 | 0.95        | 0.883954        | -1.05        | C |
| TIMP1    | F12 | 1.03  | 3.49  | 4.9E-01 | 8.9E-02 | <b>5.50</b> | 0.079558        | <b>5.50</b>  | C |
| TMEFF1   | G01 | 7.16  | 7.32  | 7.0E-03 | 6.3E-03 | 1.12        | 0.885164        | 1.12         | C |
| TMEM132A | G02 | 7.43  | 6.29  | 5.8E-03 | 1.3E-02 | 0.45        | 0.222740        | -2.20        | C |
| TSPAN13  | G03 | 8.86  | 6.59  | 2.2E-03 | 1.0E-02 | <b>0.21</b> | 0.073299        | <b>-4.83</b> | C |
| TWIST1   | G04 | 5.23  | 8.32  | 2.7E-02 | 3.1E-03 | <b>8.53</b> | <b>0.015837</b> | <b>8.53</b>  | C |
| VCAN     | G05 | 4.29  | 5.89  | 5.1E-02 | 1.7E-02 | <b>3.02</b> | 0.142889        | <b>3.02</b>  | C |
| VIM      | G06 | -1.84 | -1.05 | 3.6E+00 | 2.1E+00 | 1.73        | 0.092964        | 1.73         | C |
| VPS13A   | G07 | 6.29  | 5.42  | 1.3E-02 | 2.3E-02 | 0.55        | 0.152321        | -1.83        | C |
| WNT11    | G08 | 11.43 | 9.59  | 3.6E-04 | 1.3E-03 | <b>0.28</b> | 0.253330        | <b>-3.58</b> | C |
| WNT5A    | G09 | 1.86  | 4.62  | 2.8E-01 | 4.1E-02 | <b>6.77</b> | <b>0.011458</b> | <b>6.77</b>  | C |
| WNT5B    | G10 | 4.19  | 5.12  | 5.5E-02 | 2.9E-02 | 1.90        | 0.593441        | 1.90         | C |
| ZEB1     | G11 | 5.46  | 7.95  | 2.3E-02 | 4.0E-03 | <b>5.63</b> | <b>0.022017</b> | <b>5.63</b>  | C |
| ZEB2     | G12 | 4.33  | 6.49  | 5.0E-02 | 1.1E-02 | <b>4.47</b> | 0.067988        | <b>4.47</b>  | C |
| B2M      | H01 | -3.24 | -3.11 | 9.4E+00 | 8.7E+00 | 1.09        | 0.986231        | 1.09         | C |
| HPRT1    | H02 | 1.79  | 2.12  | 2.9E-01 | 2.3E-01 | 1.25        | 0.445519        | 1.25         | C |
| RPL13A   | H03 | -1.61 | -1.01 | 3.0E+00 | 2.0E+00 | 1.51        | 0.400912        | 1.51         | C |
| GAPDH    | H04 | 4.83  | 4.42  | 3.5E-02 | 4.7E-02 | 0.75        | 0.312110        | -1.33        | C |
| ACTB     | H05 | -1.77 | -2.41 | 3.4E+00 | 5.3E+00 | 0.64        | 0.156936        | -1.56        | C |

**Legend:**

**Fold-Change** ( $2^{(-\Delta\Delta Ct)}$ ) is the normalized gene expression ( $2^{(-\Delta Ct)}$ ) in the Test Sample divided by the normalized gene expression ( $2^{(-\Delta Ct)}$ ) in the Control Sample.

**Fold-Regulation** represents fold-change results in a biologically meaningful way. Fold-change values greater than one indicate a positive- or an up-regulation, and the fold-regulation is equal to the fold-change

Fold-change values less than one indicate a negative or down-regulation, and the fold-regulation is the negative inverse of the fold-change.

Fold-change and fold-regulation values greater than 2 are indicated in red; fold-change values less than 0.5 and fold-regulation values less than -2 are indicated in blue.

**p-values:** The p values are calculated based on a Student's t-test of the replicate  $2^{(-\Delta Ct)}$  values for each gene in the control group and treatment groups, and p values less than 0.05 are indicated in red.

**Comments:**

A: This gene's average threshold cycle is relatively high (> 30) in either the control or the test sample, and is reasonably low in the other sample (< 30).

These data mean that the gene's expression is relatively low in one sample and reasonably detected in the other sample suggesting that the actual fold-change value is at least as large as the calculated and reported fold-change result.

This fold-change result may also have greater variations if p value > 0.05; therefore, it is important to have a sufficient number of biological replicates to validate the result for this gene.

B: This gene's average threshold cycle is relatively high (> 30), meaning that its relative expression level is low, in both control and test samples, and the p-value for the fold-change is either unavailable or relatively high ( $p > 0.05$ ).

This fold-change result may also have greater variations; therefore, it is important to have a sufficient number of biological replicates to validate the result for this gene.
